# Supplementary material
Source: PubMed Central journal article supplement (PMC5761588)
Supplement: en.2017-00630.sf1.pdf [file en.2017-00630.sf1.pdf]

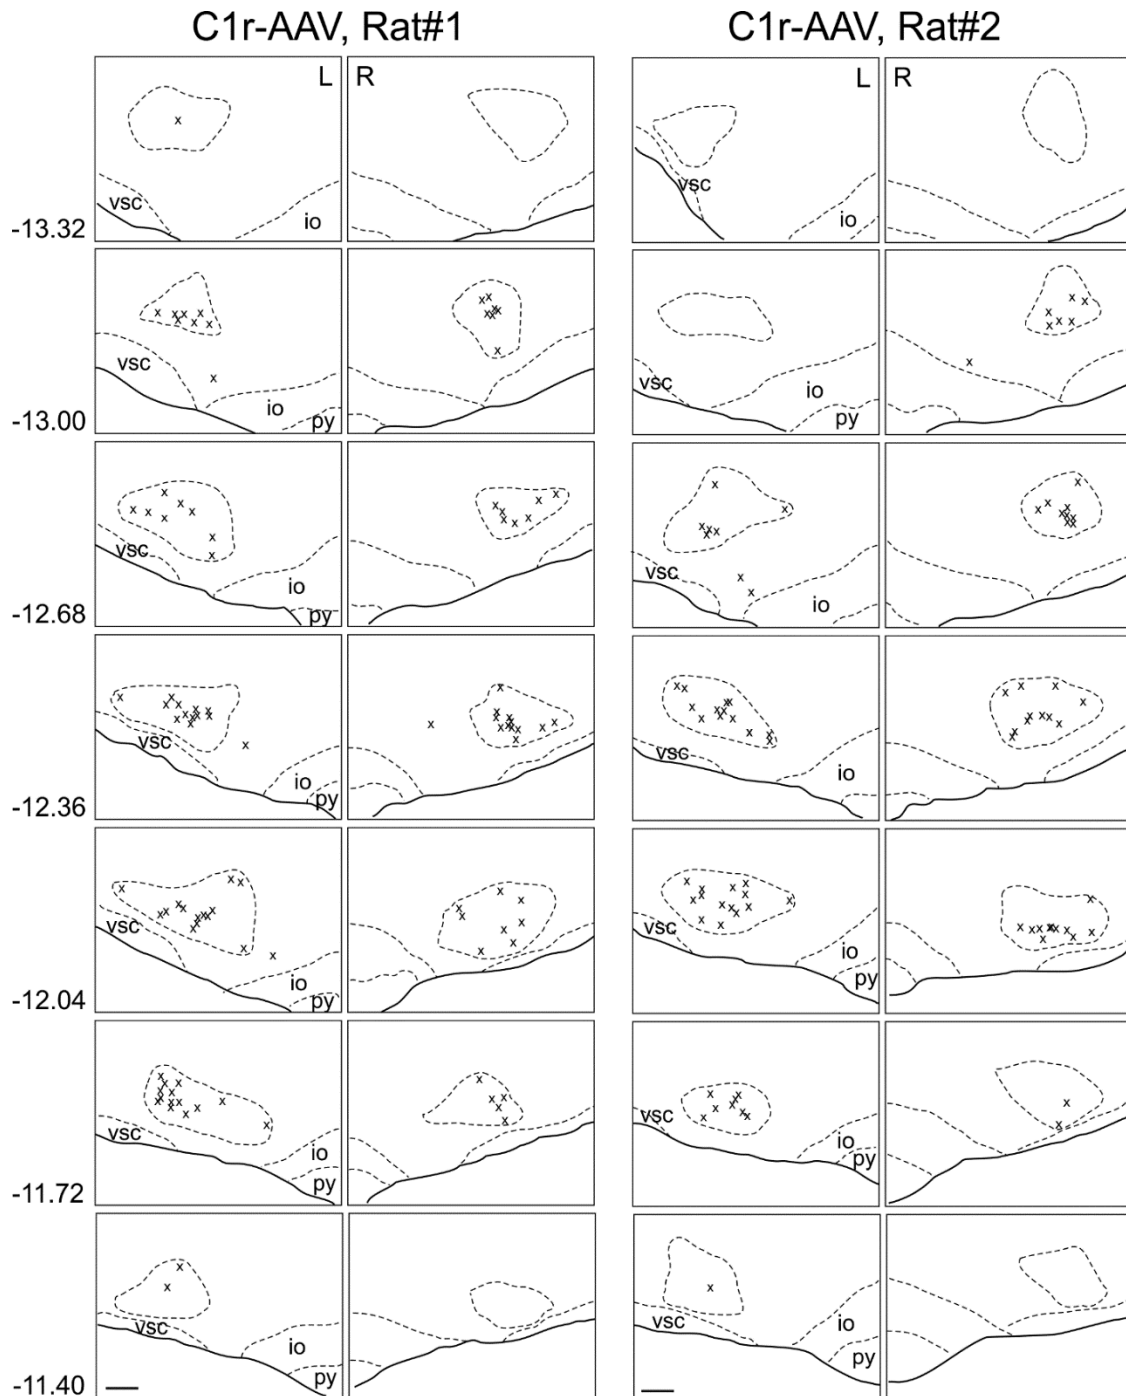

**Supplementary Fig. S4.** Schematic graphs show the distribution of mCherry-positive neurons in VLM from two C1r<sup>AAV-hM3D</sup> rats, all of which demonstrated similar staining patterns. Others as in Supplementary Fig. S1.

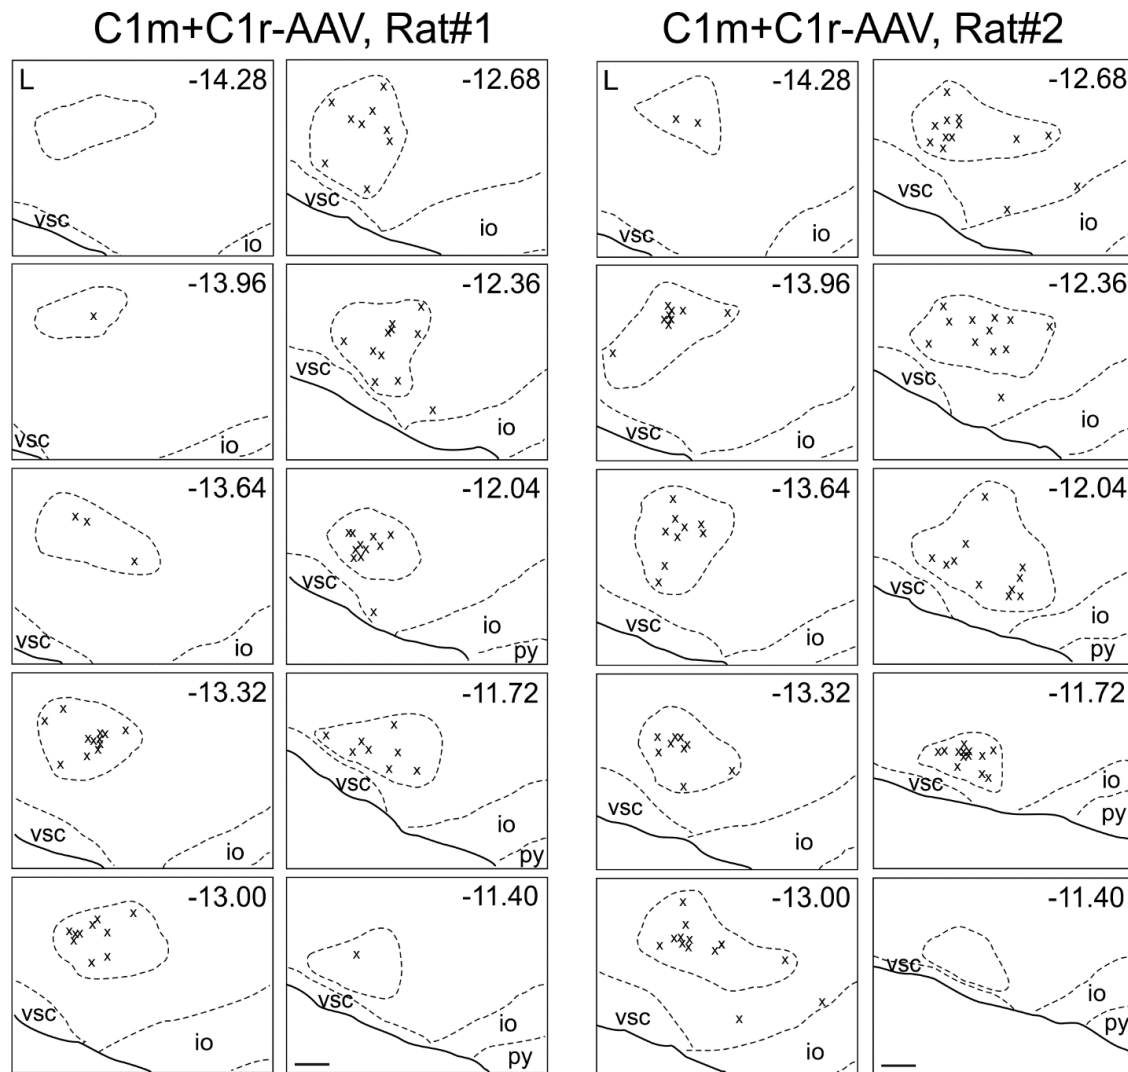

**Supplementary Fig. S5.** Schematic graphs show the distribution of mCherry-positive neurons in VLM, at ten rostrocaudal levels (millimeters caudal to bregma are shown on the top right in each panel), from two C1m+C1r<sup>AAV-hM3D</sup> rats, all of which demonstrated similar staining patterns. Others as in Supplementary Fig. S1.
